# Supplementary material for: Factors affecting health care users’ first contact with primary health care facilities in north eastern China, 2008–2018
Source: PubMed Central journal article supplement — BMJ Glob Health. 2021 Feb 17;6(2):e003907. doi: 10.1136/bmjgh-2020-003907 (PMC7893657; doi:10.1136/bmjgh-2020-003907), 2021-02-17
Supplement: bmjgh-2020-003907supp001.pdf [file bmjgh-2020-003907supp001.pdf]

**Appendix 1 Introduction of Jilin**

**Appendix 1 Figure 1 geographical position**

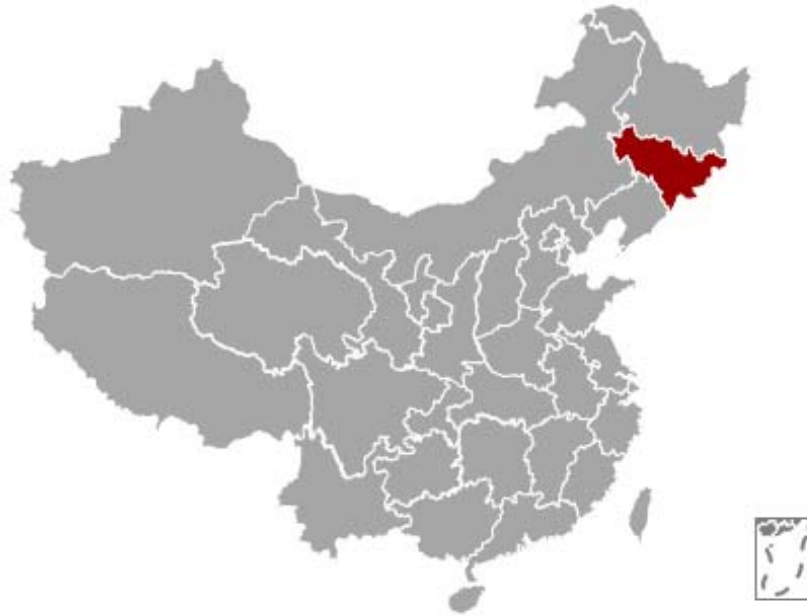

Appendix 1 Table 1 Population and GDP

| Provinces         | Population <sup>a</sup> |                 |                 |                 |                           | GDP <sup>b</sup> |                        |                           |
|-------------------|-------------------------|-----------------|-----------------|-----------------|---------------------------|------------------|------------------------|---------------------------|
|                   | Order                   | No.             | Male            | Female          | Sex ratio<br>(Female=100) | Order            | Per capita<br>GDP(RMB) | Per capita<br>GDP(dollar) |
| Guangdong         | 1                       | 104320459       | 54400538        | 49919921        | 109                       | 7                | 87059                  | 13156                     |
| Shandong          | 2                       | 95792719        | 48446944        | 47345775        | 102                       | 8                | 76391                  | 11544                     |
| Henan             | 3                       | 94029939        | 47493063        | 46536876        | 102                       | 18               | 50253                  | 7594                      |
| Sichuan           | 4                       | 80417528        | 40827834        | 39589694        | 103                       | 20               | 48975                  | 7401                      |
| Jiangsu           | 5                       | 78660941        | 39626707        | 39034234        | 102                       | 4                | 114541                 | 17309                     |
| Hebei             | 6                       | 71854210        | 36430286        | 35423924        | 103                       | 23               | 47864                  | 7233                      |
| Hunan             | 7                       | 65700762        | 33776459        | 31924303        | 106                       | 16               | 53078                  | 8021                      |
| Anhui             | 8                       | 59500468        | 30245513        | 29254955        | 103                       | 21               | 47950                  | 7246                      |
| Hubei             | 9                       | 57237727        | 29391247        | 27846480        | 106                       | 10               | 66670                  | 10075                     |
| Zhejiang          | 10                      | 54426891        | 27965641        | 26461250        | 106                       | 5                | 99301                  | 15006                     |
| Guangxi           | 11                      | 46023761        | 23924704        | 22099057        | 108                       | 28               | 41643                  | 6293                      |
| Yunnan            | 12                      | 45966766        | 23856696        | 22110070        | 108                       | 30               | 37461                  | 5661                      |
| Jiangxi           | 13                      | 44567797        | 23003521        | 21564276        | 107                       | 24               | 47546                  | 7185                      |
| Liaoning          | 14                      | 43746323        | 22147745        | 21598578        | 103                       | 13               | 57922                  | 8753                      |
| Heilongjiang      | 15                      | 38313991        | 19426106        | 18887885        | 103                       | 27               | 41954                  | 6340                      |
| Shaanxi           | 16                      | 37327379        | 19287575        | 18039804        | 107                       | 12               | 63699                  | 9626                      |
| Fujian            | 17                      | 36894217        | 18981054        | 17913163        | 106                       | 6                | 91512                  | 13829                     |
| Shanxi            | 18                      | 35712101        | 18338760        | 17373341        | 106                       | 25               | 45409                  | 6862                      |
| Guizhou           | 19                      | 34748556        | 17905471        | 16843085        | 106                       | 29               | 41332                  | 6246                      |
| Chongqing         | 20                      | 28846170        | 14608870        | 14237300        | 103                       | 11               | 66194                  | 10003                     |
| <b>Jilin</b>      | <b>21</b>               | <b>27452815</b> | <b>13907218</b> | <b>13545597</b> | <b>103</b>                | <b>14</b>        | <b>56248</b>           | <b>8500</b>               |
| Gansu             | 22                      | 25575263        | 13064193        | 12511070        | 104                       | 31               | 23015                  | 3478                      |
| Inner<br>Mongolia | 23                      | 24706291        | 12838243        | 11868048        | 108                       | 9                | 69939                  | 10569                     |
| Shanghai          | 24                      | 23019196        | 11854916        | 11164280        | 106                       | 2                | 135094                 | 20415                     |
| Xinjiang          | 25                      | 21815815        | 11270147        | 10545668        | 107                       | 19               | 44489                  | 6723                      |
| Beijing           | 26                      | 19612368        | 10126430        | 9485938         | 107                       | 1                | 139607                 | 21097                     |
| Tianjin           | 27                      | 12938693        | 6907091         | 6031602         | 115                       | 3                | 120754                 | 18248                     |
| Hainan            | 28                      | 8671485         | 4592283         | 4079202         | 113                       | 17               | 52158                  | 7882                      |
| Ningxia           | 29                      | 6301350         | 3227404         | 3073946         | 105                       | 15               | 54302                  | 8206                      |
| Qinghai           | 30                      | 5626723         | 2913793         | 2712930         | 107                       | 22               | 47890                  | 7237                      |
| Tibet             | 31                      | 3002165         | 1542652         | 1459513         | 106                       | 26               | 39559                  | 5978                      |

Appendix 1 Table 2 Average out-of-pocket medical costs on outpatient care <sup>c</sup>

| Provinces      | 2008      |                                                             |                                                                 | 2013      |                                                             |                                                                | 2018     |                                                             |                                                                |
|----------------|-----------|-------------------------------------------------------------|-----------------------------------------------------------------|-----------|-------------------------------------------------------------|----------------------------------------------------------------|----------|-------------------------------------------------------------|----------------------------------------------------------------|
|                | Order     | Average out-of-pocket medical costs on outpatient care(RMB) | Average out-of-pocket medical costs on outpatient care(dollars) | Order     | Average out-of-pocket medical costs on outpatient care(RMB) | Average out-of-pocket medical costs on outpatient care(dollar) | Order    | Average out-of-pocket medical costs on outpatient care(RMB) | Average out-of-pocket medical costs on outpatient care(dollar) |
| Anhui          | 18        | 129.8                                                       | 19.6                                                            | 23        | 180.1                                                       | 27.2                                                           | 22       | 238.9                                                       | 36.1                                                           |
| Beijing        | 1         | 301.9                                                       | 45.6                                                            | 1         | 393.4                                                       | 59.4                                                           | 1        | 544.8                                                       | 82.3                                                           |
| Fujian         | 17        | 130.7                                                       | 19.7                                                            | 24        | 171.0                                                       | 25.8                                                           | 13       | 261.8                                                       | 39.5                                                           |
| Gansu          | 30        | 80.2                                                        | 12.1                                                            | 29        | 146.5                                                       | 22.1                                                           | 30       | 187.8                                                       | 28.4                                                           |
| Guangdong      | 21        | 123.9                                                       | 18.7                                                            | 18        | 188.7                                                       | 28.5                                                           | 7        | 281.7                                                       | 42.6                                                           |
| Guangxi        | 28        | 101.9                                                       | 15.4                                                            | 27        | 154.8                                                       | 23.4                                                           | 28       | 206.2                                                       | 31.1                                                           |
| Guizhou        | 11        | 140.3                                                       | 21.2                                                            | 13        | 199.0                                                       | 30.1                                                           | 23       | 236.2                                                       | 35.7                                                           |
| Hainan         | 13        | 134                                                         | 20.2                                                            | 15        | 194.0                                                       | 29.3                                                           | 12       | 262.6                                                       | 39.7                                                           |
| Hebei          | 12        | 137.2                                                       | 20.7                                                            | 16        | 191.2                                                       | 28.9                                                           | 21       | 239.5                                                       | 36.2                                                           |
| Henan          | 27        | 104.6                                                       | 15.8                                                            | 30        | 146.0                                                       | 22.1                                                           | 29       | 193.8                                                       | 29.3                                                           |
| Heilongjiang   | 9         | 150.8                                                       | 22.8                                                            | 7         | 213.8                                                       | 32.3                                                           | 11       | 264.9                                                       | 40.0                                                           |
| Hubei          | 15        | 133.3                                                       | 20.1                                                            | 17        | 190.0                                                       | 28.7                                                           | 19       | 243.6                                                       | 36.8                                                           |
| Hunan          | 6         | 158.3                                                       | 23.9                                                            | 6         | 223.7                                                       | 33.8                                                           | 6        | 290.7                                                       | 43.9                                                           |
| <b>Jilin</b>   | <b>14</b> | <b>133.6</b>                                                | <b>20.2</b>                                                     | <b>11</b> | <b>203.7</b>                                                | <b>30.8</b>                                                    | <b>9</b> | <b>275.9</b>                                                | <b>41.7</b>                                                    |
| Jiangsu        | 7         | 157.6                                                       | 23.8                                                            | 8         | 211.1                                                       | 31.9                                                           | 8        | 281.2                                                       | 42.5                                                           |
| Jiangxi        | 24        | 117.4                                                       | 17.7                                                            | 22        | 180.4                                                       | 27.3                                                           | 14       | 256.5                                                       | 38.7                                                           |
| Liaoning       | 5         | 164.6                                                       | 24.9                                                            | 4         | 230.2                                                       | 34.8                                                           | 5        | 308.0                                                       | 46.5                                                           |
| Inner Mongolia | 22        | 122.9                                                       | 18.6                                                            | 14        | 195.8                                                       | 29.6                                                           | 18       | 251.0                                                       | 37.9                                                           |
| Ningxia        | 19        | 126.6                                                       | 19.1                                                            | 25        | 162.0                                                       | 24.5                                                           | 25       | 225.1                                                       | 34.0                                                           |
| Qinghai        | 29        | 88.8                                                        | 13.4                                                            | 26        | 159.8                                                       | 24.1                                                           | 26       | 217.1                                                       | 32.8                                                           |
| Shandong       | 8         | 154.4                                                       | 23.3                                                            | 12        | 199.5                                                       | 30.1                                                           | 17       | 253.8                                                       | 38.3                                                           |
| Shanxi         | 16        | 132.4                                                       | 20.0                                                            | 9         | 206.3                                                       | 31.2                                                           | 16       | 255.7                                                       | 38.6                                                           |
| Shaanxi        | 20        | 124.4                                                       | 18.8                                                            | 19        | 185.7                                                       | 28.1                                                           | 20       | 243.4                                                       | 36.8                                                           |
| Shanghai       | 2         | 224.5                                                       | 33.9                                                            | 2         | 283.6                                                       | 42.8                                                           | 2        | 378.8                                                       | 57.2                                                           |
| Sichuan        | 25        | 112.8                                                       | 17.0                                                            | 20        | 182.7                                                       | 27.6                                                           | 15       | 256.4                                                       | 38.7                                                           |
| Tianjin        | 3         | 193.1                                                       | 29.2                                                            | 3         | 260.0                                                       | 39.3                                                           | 3        | 339.3                                                       | 51.3                                                           |
| Tibet          | 31        | 49.1                                                        | 7.4                                                             | 31        | 117.6                                                       | 17.8                                                           | 31       | 183.1                                                       | 27.7                                                           |
| Xinjiang       | 23        | 122.3                                                       | 18.5                                                            | 21        | 181.4                                                       | 27.4                                                           | 24       | 231.8                                                       | 35.0                                                           |
| Yunnan         | 26        | 106.7                                                       | 16.1                                                            | 28        | 152.5                                                       | 23.0                                                           | 27       | 214.1                                                       | 32.3                                                           |
| Zhejiang       | 4         | 168.2                                                       | 25.4                                                            | 10        | 205.8                                                       | 31.1                                                           | 10       | 265.3                                                       | 40.1                                                           |
| Chongqing      | 10        | 150.3                                                       | 22.7                                                            | 5         | 229.7                                                       | 34.7                                                           | 4        | 320.1                                                       | 48.4                                                           |

**Notes:**

† Data source: a, Sixth nationwide population census in 2010; b, Provincial statistical offices in 2018; c,

Statistical yearbook of health and family planning in China.

‡ Exchange rate: 1\$ = 6.62RMB in 2018.

### Appendix 2 Sampling procedure

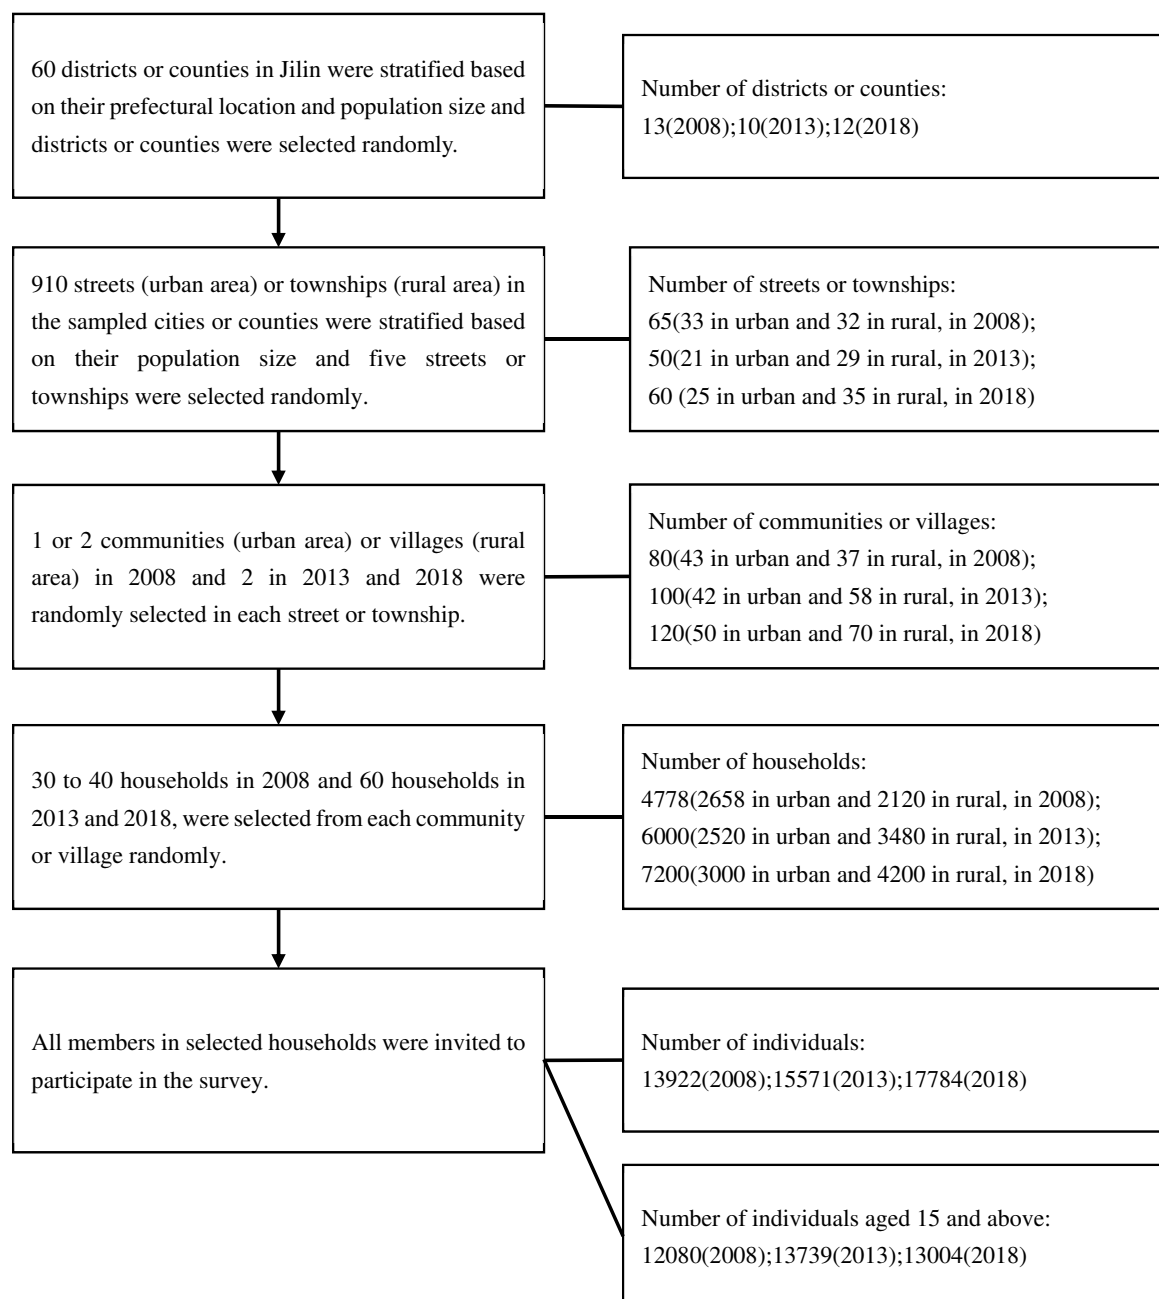

**Appendix 3 Types of hospitals health care users' first contact of for outpatient care, in Jilin, 2008-2018**

| <b>Types of hospitals</b>                          | <b>Group</b>                    | <b>N</b> | <b>%</b> |
|----------------------------------------------------|---------------------------------|----------|----------|
| Village clinics and township hospitals             |                                 | 1,556    | 47.12    |
| Community stations                                 | PHC facilities                  | 68       | 2.06     |
| Community health centers                           |                                 | 577      | 17.47    |
| County/district level hospitals and health centers |                                 | 700      | 21.20    |
| Province level hospitals and health centers        | Secondary or tertiary hospitals | 261      | 7.90     |
| Private health clinics                             |                                 | 70       | 2.12     |
| Others                                             |                                 | 70       | 2.12     |

**Appendix 4 Table 1 Prevalence of different types of diseases, in Jilin, 2008-2018**

| Type of diseases                         | 2008 |      | 2013  |       | 2018  |       |
|------------------------------------------|------|------|-------|-------|-------|-------|
|                                          | n    | %    | n     | %     | n     | %     |
| Hypertensions and/or diabetes            | 133  | 1.10 | 2,124 | 15.46 | 2,767 | 21.28 |
| Acute upper respiratory tract infections | 201  | 1.66 | 349   | 2.54  | 913   | 7.02  |
| Diseases recommended to PHC facilities   | 356  | 2.95 | 521   | 3.79  | 2,204 | 16.95 |
| Other ailments                           | 411  | 3.40 | 554   | 4.03  | 2,799 | 21.52 |

**Appendix 4 Table 2 Percentage of the total survey who report having different types of diseases seeking for outpatient care in Jilin, 2008-2018**

| Type of diseases                         | 2008 |      | 2013 |      | 2018 |      |
|------------------------------------------|------|------|------|------|------|------|
|                                          | n    | %    | n    | %    | n    | %    |
| Hypertensions and/or diabetes            | 51   | 0.42 | 352  | 2.56 | 385  | 2.96 |
| Acute upper respiratory tract infections | 65   | 0.54 | 196  | 1.43 | 250  | 1.92 |
| Diseases recommended to PHC facilities   | 169  | 1.40 | 175  | 1.27 | 537  | 4.13 |
| Other ailments                           | 197  | 1.63 | 212  | 1.54 | 713  | 5.48 |

**Appendix 5 Trends in health care users' first contact with primary health care facilities for outpatient care, in Jilin, 2008-2018, by urban and rural settings**

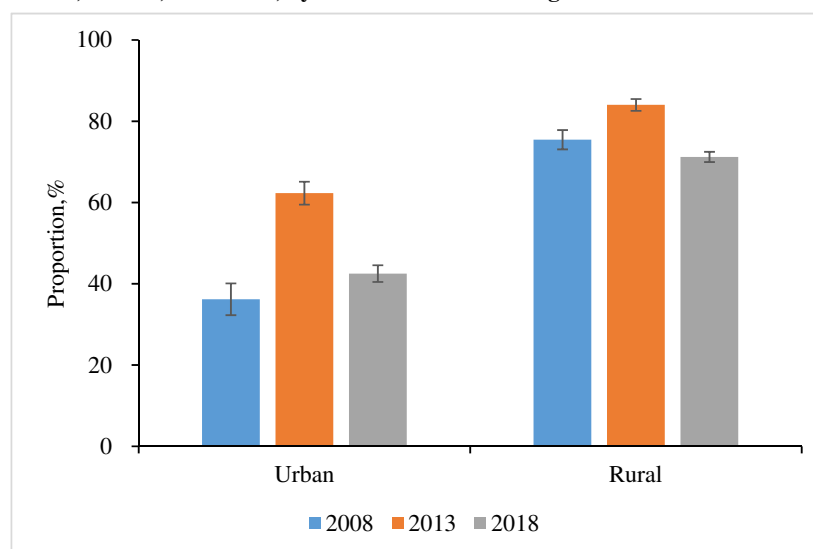

**Notes:**

† For each episode of illness, the survey asked type of the first contacted health facilities. First contact for chronic conditions were asked about the most frequent consulted provider.

‡ Proportions were weighted to yield provincially representative estimates. 95% confidence intervals were shown.

§ Primary health care (PHC) facilities included community health centers and stations, township hospitals, village health centers, and clinics.



**Appendix 6 First contact with primary health care facilities for outpatient care by health care users with and without a contract family doctor, in Jilin, in 2018, by urban and rural settings**

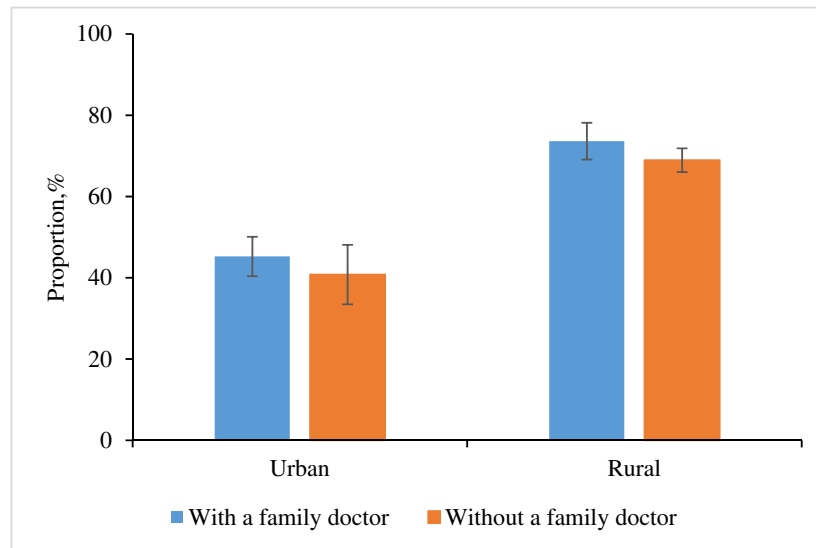

**Notes:**

† Whether the health care users had a contracted family doctor, defined as whether he/she had a formal contract with any PHC doctor within a government program that provides regular consultation and health management services.

‡ The questions about family doctors were only asked in the 2018 survey. 95% confidence intervals were shown.

§ Adjusting for sampling, and sex, age, diseases, social health insurance, household income per capita, educational achievement and ethnicity.

**Appendix 7 Table 1 Trend of first contact of primary health care facilities for outpatient care amongst health care users answering questions personally in Jilin, 2008-2018, by urban and rural settings**

| Characteristic | Urban |                                   |                     |                         | Rural |                                   |                     |                         |
|----------------|-------|-----------------------------------|---------------------|-------------------------|-------|-----------------------------------|---------------------|-------------------------|
|                | N     | Choice of<br>PHC<br>facilities, % | Crude<br>RR(95% CI) | Adjusting<br>RR(95% CI) | N     | Choice of<br>PHC<br>facilities, % | Crude<br>RR(95% CI) | Adjusting<br>RR(95% CI) |
| <b>Year</b>    |       |                                   |                     |                         |       |                                   |                     |                         |
| 2008           | 112   | 40.87                             | 0.66(0.50,0.86)**   | 0.79(0.59,1.04)         | 264   | 76.10                             | 0.87(0.80,0.96)*    | 0.94(0.86,1.03)         |
| 2013           | 260   | 62.39                             | ref                 | ref                     | 535   | 87.03                             | ref                 | ref                     |
| 2018           | 519   | 43.10                             | 0.69(0.60,0.80)**   | 0.90(0.76,1.06)         | 1,181 | 73.07                             | 0.84(0.80,0.88)*    | 0.89(0.85,0.94)*        |

† Adjusting for sampling, and sex, age, diseases, social health insurance, household income per capita, educational achievement and ethnicity.

**Appendix 7 Table 2 Trend of first contact of primary health care facilities for outpatient care amongst health care users answering questions not personally in Jilin, 2008-2018, by urban and rural settings**

| Characteristic | Urban |                                   |                     |                         | Rural |                                   |                     |                         |
|----------------|-------|-----------------------------------|---------------------|-------------------------|-------|-----------------------------------|---------------------|-------------------------|
|                | N     | Choice of<br>PHC<br>facilities, % | Crude<br>RR(95% CI) | Adjusting<br>RR(95% CI) | N     | Choice of<br>PHC<br>facilities, % | Crude<br>RR(95% CI) | Adjusting<br>RR(95% CI) |
| <b>Year</b>    |       |                                   |                     |                         |       |                                   |                     |                         |
| 2008           | 40    | 31.21                             | 0.46(0.26,0.81)*    | 0.57(0.28,1.16)         | 66    | 75.34                             | 0.88(0.73,1.06)     | 0.99(0.83,1.19)         |
| 2013           | 37    | 67.58                             | ref                 | ref                     | 103   | 85.75                             | ref                 | ref                     |
| 2018           | 60    | 33.88                             | 0.50(0.32,0.78)*    | 0.43(0.25,0.75)*        | 125   | 64.73                             | 0.75(0.64,0.89)*    | 0.80(0.67,0.95)*        |

† Adjusting for sampling, and sex, age, diseases, social health insurance, household income per capita, educational achievement and ethnicity.
